# Supplementary material for: Dysregulated Expression of Selected miRNAs in Human Papillomavirus-Positive Patients with Benign Prostatic Hyperplasia/Prostatitis and Prostate Cancer
Source: Preprints.org preprint supplement (doi:10.20944/preprints202409.1179.v1), 2024-09-16
Supplement: Supplementary file 1 [file supplementary]

| **Supplementary table 1.** Database of the genotyping of each PCa sample. | | | |
| --- | --- | --- | --- |
| **Sample** | **Diagnostic** | **Genotype (s)** | **Classification** |
| 1 | Low-grade Gleason 6 (3+3) | 16 | HR |
| 2 | Low-grade Gleason 6 (3+3) | 16 | HR |
| 3 | High-grade Gleason 8 (4+4) | 33 | IR |
| 4 | High-grade Gleason 10 (5+5) | 33 | IR |
| 5 | High-grade Gleason 6 (3+3) | 11 | LR |
| 6 | High-grade Gleason 8 (4+4) | 11 | LR |
| 7 | High-grade Gleason 9 (4+5) | 18, 33 | Co-infection HR, IR |
| 8 | High-grade Gleason 8 (4+4) | 16 | HR |
| 9 | Medium-grade Gleason 7 (4+3) | 16, 31 | Co-infection HR, IR |
| 10 | High-grade Gleason 10 (5+5) | 31 | IR |
| 11 | High-grade Gleason 9 (5+4) | 16, 6 | Co-infection HR, LR |
| 12 | High-grade Gleason 9 (4+5) | 31, 6 | Co-infection IR, LR |
| 13 | High-grade Gleason 9 (5+4) | 18 | HR |
| 14 | Medium-grade Gleason 7 (4+3) y 6 (3+3) | 18, 58 | Co-infection HR, IR |
| 15 | Medium-grade Gleason 7 (4+3) | 18 | HR |
| 17 | High-grade Gleason 8 (4+4) | 52, 31 | Co-infection IR |
| 18 | High-grade Gleason 8 (4+4) | 31 | IR |
| 20 | High-grade Gleason 8 (4+4) | 33 | IR |
| 21 | High-grade Gleason 8 (4+4) | 31, 6 | Co-infection IR, LR |
| 22 | High-grade Gleason 9 (4+5) | 31, 6, 52 | Co-infection IR, LR |
| 23 | High-grade Gleason 8 (4+4) | 6, 52 | Co-infection IR, LR |
| 24 | High-grade Gleason 8 (4+4) | 33 | IR |
| 25 | High-grade Gleason 8 (4+4) | 6 | LR |
| 26 | Low-grade Gleason 6 (3+3) | 6 | LR |
| 27 | High-grade Gleason 8 (4+4) | 33, 52 | Co-infection IR |
| 28 | Low-grade Gleason 6 (3+3) | 16 | HR |
| 29 | Low-grade Gleason 6 (3+3) | 58, 11 | Co-infection IR, LR |
| 30 | Low-grade Gleason 6 (3+3) | 6, 52 | Co-infection IR, LR |
| 31 | Low-grade Gleason 6 (3+3) | 16, 52 | Co-infection HR, IR |
| LR: low risk genotypes, IR: intermediate risk genotypes, HR: high risk genotypes. | | | |
